# Supplementary material for: The Effect Of Body Composition On Strenght An Power In Male And Female Students
Source: Research Square preprint supplement (doi:10.21203/rs.3.rs-370358/v1), 2021-04-12
Supplement: Supplementary file 1 [file 997ab9f391f85d23b0dd93dc.pdf]

## Tables Legend

**Table 1:** Anthropometric characteristics of the subjects.  $\Delta$  F/M (%): difference between female and male subjects expressed as in % of the value of male students.

**Table 2:** Absolute and relative (to body mass: BM and to lean mass: LM) hand gripping and back strength performances of male and female subjects. Data presentation as in Table 1.

**Table 3:** Performances of male and female subjects after ballasting. Data presentation as in Table 1.  $\Delta$  F/wM (%): difference between female and weighted male students expressed as in % of the value of weighted male students.

**Table 1**

| <b>Groups</b>                         | <b>Body mass<br/>(kg)</b> | <b>Height<br/>(m)</b> | <b>BMI<br/>(kg/m<sup>2</sup>)</b> | <b>Body fat<br/>(%)</b> |
|---------------------------------------|---------------------------|-----------------------|-----------------------------------|-------------------------|
| <b>Male (n=72)</b>                    | 72.8±7                    | 1.75±0.05             | 23.5±2                            | 17.2±1.8                |
| <b>Female (n=64)</b>                  | 61.4±7                    | 1.62±0.05             | 23.23±2.01                        | 25.0±2.5                |
| <b><math>\Delta</math> F/M (in %)</b> | 15.7<br>P<0.001           | 7.4<br>P<0.001        | 0.9<br>NS                         | -45.5<br>P<0.001        |

**Table 2**

| <b>Tests<br/>Groups</b> | <b>Hand grip<br/>(HG)<br/>(kg)</b> | <b>Hand grip<br/>relative to<br/>body mass<br/>(HG/BM)</b> | <b>Hand<br/>grip<br/>relative<br/>to lean<br/>mass<br/>(HG/LM)</b> | <b>Back<br/>strength<br/>(BS)<br/>(kg)</b> | <b>Back<br/>strength<br/>relative to<br/>body mass<br/>(BS /MC)</b> | <b>Back<br/>strength<br/>relative to<br/>lean mass<br/>(BS/MM)</b> |
|-------------------------|------------------------------------|------------------------------------------------------------|--------------------------------------------------------------------|--------------------------------------------|---------------------------------------------------------------------|--------------------------------------------------------------------|
| <b>Male (n=72)</b>      | 44.0±5                             | 0.6±0.08                                                   | 0.74±0.10                                                          | 141.0±18                                   | 2±0.26                                                              | 2.4±0.3                                                            |
| <b>Female (n=64)</b>    | 31.0±4                             | 0.5±0.06                                                   | 0.67±0.06                                                          | 81.6±13                                    | 1.3±0.2                                                             | 2±0.2                                                              |
| <b>Δ F/M (%)</b>        | 30.8                               | 18.03                                                      | 9.46                                                               | 43.7                                       | 31.1                                                                | 15.7                                                               |
|                         | p<0.001                            | p<0.001                                                    | p<0.01                                                             | p<0.001                                    | p<0.001                                                             | p<0.01                                                             |

Table 3

| <b>Tests</b><br><b>Groups</b>                                                                                       | <b>5JT</b><br><b>(m)</b> | <b>SJ</b>                    |                                  |
|---------------------------------------------------------------------------------------------------------------------|--------------------------|------------------------------|----------------------------------|
|                                                                                                                     |                          | <b>Height</b><br><b>(cm)</b> | <b>Power</b><br><b>(Watt/kg)</b> |
| <b>Male</b>                                                                                                         | 11.4±0.5                 | 32.4±2.7                     | 15.8±1.40                        |
| <b>weighted Male</b>                                                                                                | 9.9±0.5                  | 27.8±2.5                     | 12.8±1                           |
| <b>Female</b>                                                                                                       | 8.7±0.71                 | 21.1±1.9                     | 11.9±1.1                         |
| <b>Δ M/F (%)</b>                                                                                                    | 23.5                     | 34.7                         | 24.9                             |
| <b>Male vs. Female</b>                                                                                              | P<0.001                  | P<0.001                      | P<0.001                          |
| <b>Δ F/wM (%)</b>                                                                                                   | 11,7                     | 23.8                         | 7.0                              |
| <b>Female vs</b><br><b>weighted Male</b>                                                                            | P<0.001                  | P<0.001                      | P<0.001                          |
| <b>Δ reduction (%)</b><br><br><b>Male vs. Female</b><br><br>(after cancelling the<br>sex difference in fat<br>mass) | 50,1                     | 31,4                         | 71,7                             |
| <b>Δ wM/M (%)</b>                                                                                                   | 13.3                     | 14.3                         | 19.2                             |
| <b>Male vs. weighted</b><br><b>Male</b>                                                                             | P<0.05                   | P<0.01                       | P<0.05                           |
